# Supplementary material
Source: publisher site journal article supplement (https://www.dovepress.com/article/351261)
Supplement: Supplementary file 1 [file get_supplementary_file.php]

**Supplemental Material**

**Supplemental Table index**

Tab. 1 First response countries/regions to COVID-19 vs. SARS

Tab. 2 First response countries/regions for COVID-19

Tab. 3 Monthly COVID-19 publications in various countries

Tab. 4 Publication-journal ratio of COVID-19 and SARS in the year after the first disclosed case

Tab. 5 Journals and publications in the top five relative categories of SARS and COVID-19 research (2003-2020)

Tab. 6 First co-occurrence terms and months for different research themes for COVID-19 and SARS

**Supplemental Figure index**

Fig. S1 COVID-19 publications in various countries at different intervals from December. 8, 2019-Dec. 7, 2020

Fig. S2 SARS publication trends over five years after the first global case[[1]](#footnote-1)

Fig. S3 COVID-19 publication trends over 12 months after the first disclosed case

**Supplemental Search Syntax index**

Syntax 1: SARS

Syntax 2: COVID-19

**Tab. 1 First response countries/regions to COVID-19 vs. SARS**

| Months after the world’s first open case | Interval 1 | Interval 2 | Interval 3 | Interval 4 | Interval 5 | Interval 6 |
| --- | --- | --- | --- | --- | --- | --- |
| COVID-19 | 0 | 28 | 36 | 73 | 101 | 114 |
| SARS | 0 | 0 | 0 | 1 | 5 | 6 |

Source: PubMed

**Tab. 2 First response countries/regions for COVID-19**

| Country/  Region | Date of the first confirmed case (A) | Date of the first publication (B) | Days between  A and B | Reference for the first confirmed case |
| --- | --- | --- | --- | --- |
| Australia | 2020/1/25 | 2020/1/30 | 5 | https://en.wikipedia.org/wiki/COVID-19_pandemic_in_Australia |
| Belgium | 2020/2/4 | 2020/2/6 | 2 | https://en.wikipedia.org/wiki/COVID-19_pandemic_in_Belgium |
| Canada | 2020/1/25 | 2020/1/31 | 6 | https://www.canadianhealthcarenetwork.ca/covid-19-a-canadian-timeline |
| China | 2019/12/8 | 2020/1/21 | 44 |  |
| France | 2020/1/24 | 2020/2/6 | 13 | https://www.ncbi.nlm.nih.gov/pmc/articles/PMC7029452/ |
| Germany | 2020/1/27 | 2020/1/30 | 3 | https://en.wikipedia.org/wiki/COVID-19_pandemic_in_Germany |
| Greece | 2020/2/26 | 2020/1/29 | -28 | https://www.reuters.com/article/us-china-health-greece-idUSKCN20K1IA |
| Iran | 2020/2/19 | 2020/2/5 | -14 | https://www.garda.com/crisis24/news-alerts/315441/iran-first-cases-of-coronavirus-covid-19-confirmed-february-19-update-1 |
| Italy | 2020/1/31 | 2020/2/5 | 6 | https://en.wikipedia.org/wiki/COVID-19_pandemic_in_Italy |
| Netherlands | 2020/2/27 | 2020/1/24 | -33 | https://en.wikipedia.org/wiki/COVID-19_pandemic_in_the_Netherlands#January_2020 |
| Pakistan | 2020/2/26 | 2020/2/4 | -22 | https://en.wikipedia.org/wiki/COVID-19_pandemic_in_Pakistan |
| Portugal | 2020/3/2 | 2020/2/7 | -24 | https://www.aa.com.tr/en/europe/portugal-reports-1st-coronavirus-death/1768310 |
| Saudi Arabia | 2020/3/2 | 2020/2/10 | -21 | https://en.wikipedia.org/wiki/COVID-19_pandemic_in_Saudi_Arabia |
| South Korea | 2020/1/20 | 2020/2/3 | 14 | https://en.wikipedia.org/wiki/COVID-19_pandemic_in_South_Korea |
| Sweden | 2020/1/31 | 2020/1/31 | 0 | https://en.wikipedia.org/wiki/COVID-19_pandemic_in_Sweden |
| Switzerland | 2020/2/25 | 2020/2/5 | -20 | https://www.swissinfo.ch/eng/covid-19_first-coronavirus-death-recorded-in-switzerland/45597610 |
| United Kingdom | 2020/1/31 | 2020/1/28 | -3 | https://en.wikipedia.org/wiki/COVID-19_pandemic_in_the_United_Kingdom |
| United States | 2020/1/20 | 2020/1/22 | 2 | https://www.cdc.gov/media/releases/2020/s0229-COVID-19-first-death.html |
| Norway | 2020/2/26 | 2020/1/25 | -32 | https://en.wikipedia.org/wiki/COVID-19_pandemic_in_Norway |
| Vietnam | 2020/1/23 | 2020/1/28 | 5 | https://www.ncbi.nlm.nih.gov/pmc/articles/PMC7146658/ |
| Spain | 2020/1/31 | 2020/1/27 | -4 | https://en.wikipedia.org/wiki/COVID-19_pandemic_in_Spain |
| Turkey | 2020/3/11 | 2020/2/4 | 36 | https://en.wikipedia.org/wiki/COVID-19_pandemic_in_Turkey |
| Singapore | 2020/1/23 | 2020/1/28 | 5 | https://en.wikipedia.org/wiki/COVID-19_pandemic_in_Singapore |
| Poland | 2020/3/4 | 2020/2/7 | -26 | https://en.wikipedia.org/wiki/COVID-19_pandemic_in_Poland |
| Finland | 2020/1/29 | 2020/2/7 | 9 | https://en.wikipedia.org/wiki/COVID-19_pandemic_in_Finland |
| Colombia | 2020/3/6 | 2020/2/6 | -29 | https://en.wikipedia.org/wiki/COVID-19_pandemic_in_Colombia |
| Denmark | 2020/2/27 | 2020/2/4 | -23 | https://en.wikipedia.org/wiki/COVID-19_pandemic_in_Denmark |
| Taiwan | 2020/1/21 | 2020/2/4 | 14 | https://en.wikipedia.org/wiki/COVID-19_pandemic_in_Taiwan |
| Average |  |  | -4.1 |  |

Source: PubMed and WIKI

**Tab. 3 Monthly COVID-19 publications in various countries**

|  | Interval 1 | Interval 2 | Interval 3 | Interval 4 | Interval 5 | Interval 6 | Interval 7 | Interval 8 | Interval 9 | Interval 10 | Interval 11 | Interval 12 |
| --- | --- | --- | --- | --- | --- | --- | --- | --- | --- | --- | --- | --- |
| USA | 0 | 23 | 94 | 259 | 865 | 1674 | 2213 | 2316 | 2514 | 2464 | 2482 | 2297 |
| China | 0 | 45 | 199 | 442 | 715 | 925 | 956 | 992 | 947 | 933 | 943 | 987 |
| UK | 0 | 6 | 41 | 127 | 404 | 681 | 912 | 950 | 1019 | 907 | 1035 | 1050 |
| Italy | 0 | 3 | 27 | 93 | 362 | 591 | 721 | 658 | 739 | 652 | 677 | 692 |
| India | 0 | 21 | 16 | 75 | 205 | 299 | 441 | 386 | 494 | 442 | 528 | 422 |
| Canada | 0 | 6 | 19 | 40 | 135 | 280 | 354 | 294 | 368 | 343 | 352 | 369 |
| Germany | 0 | 2 | 18 | 52 | 137 | 247 | 326 | 324 | 330 | 316 | 362 | 350 |
| Spain | 0 | 2 | 7 | 30 | 107 | 204 | 248 | 316 | 341 | 334 | 367 | 362 |
| Australia | 0 | 4 | 20 | 40 | 94 | 208 | 245 | 276 | 343 | 329 | 293 | 357 |
| France | 0 | 3 | 15 | 33 | 138 | 272 | 234 | 284 | 292 | 245 | 310 | 287 |
| Brazil | 0 | 1 | 9 | 28 | 69 | 118 | 206 | 155 | 260 | 212 | 209 | 250 |
| Switzerland | 0 | 2 | 6 | 34 | 92 | 130 | 145 | 152 | 151 | 135 | 137 | 179 |
| Iran | 0 | 2 | 19 | 56 | 63 | 88 | 139 | 125 | 162 | 158 | 164 | 159 |
| Netherlands | 0 | 2 | 7 | 18 | 57 | 102 | 155 | 155 | 154 | 152 | 140 | 142 |
| Turkey | 0 | 0 | 5 | 12 | 34 | 115 | 107 | 109 | 169 | 124 | 164 | 158 |
| Japan | 0 | 5 | 6 | 19 | 52 | 67 | 96 | 130 | 129 | 144 | 151 | 142 |
| South Korea | 0 | 4 | 12 | 27 | 58 | 85 | 98 | 100 | 140 | 112 | 115 | 134 |
| Singapore | 0 | 2 | 10 | 35 | 60 | 100 | 123 | 97 | 118 | 99 | 93 | 95 |
| Belgium | 0 | 1 | 6 | 22 | 48 | 83 | 95 | 104 | 113 | 108 | 101 | 103 |
| Saudi Arabia | 0 | 3 | 10 | 21 | 23 | 40 | 89 | 71 | 136 | 111 | 135 | 138 |

Source:Web of Science

Search theme: COVID-19: “covid-19”

Note: Modification of original data derived from Web of Science includes: The data of China includes “Peoples R China” ;The data of UK includes “England”, “Wales”, “North Ireland”, “Scotland”; The data of USA includes “United States of America”, “United States.”


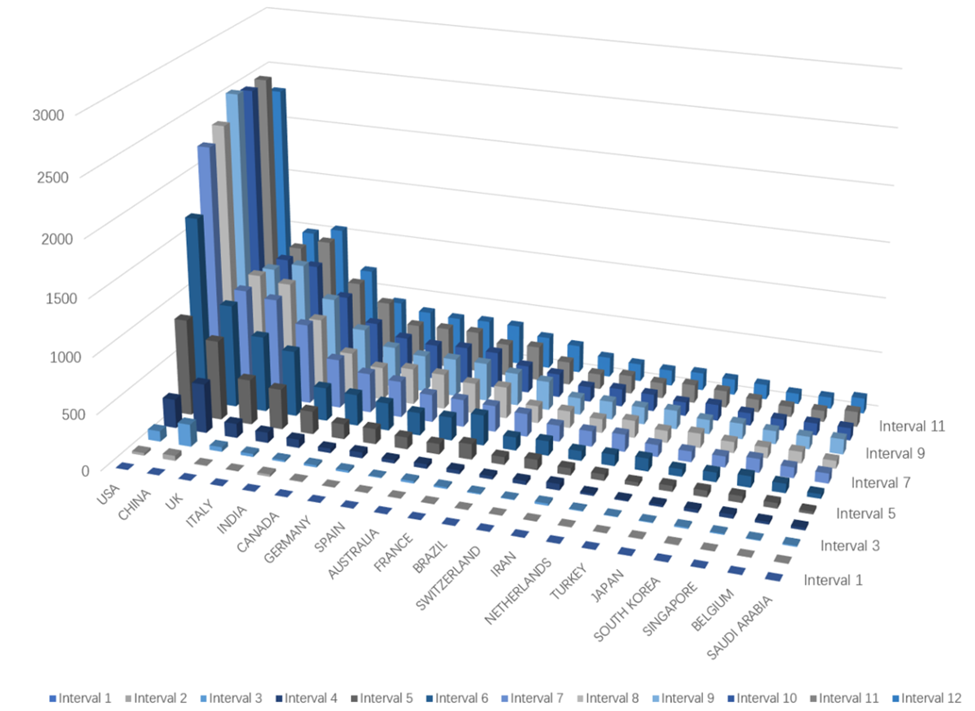


**Fig. S1** **COVID-19 publications in various countries at different intervals from December. 8, 2019-Dec. 7, 2020**

Source: Web of Science

**Tab. 4 Publication-journal ratio of COVID-19 and SARS in the year after the first disclosed case**

|  | Covid-19 | | | SARS | | |
| --- | --- | --- | --- | --- | --- | --- |
| **Journal** | **Publication** | **Publication/Journal** | **Journal** | **Publication** | **Publication/Journal** |
| Interval 1 | 0 | 0 | 0.00 | 0 | 0 | 0.00 |
| Interval 2 | 36 | 59 | 1.64 | 0 | 0 | 0.00 |
| Interval 3 | 161 | 415 | 2.58 | 0 | 0 | 0.00 |
| Interval 4 | 474 | 1588 | 3.35 | 1 | 1 | 1.00 |
| Interval 5 | 1196 | 4690 | 3.92 | 14 | 35 | 2.50 |
| Interval 6 | 1207 | 5236 | 4.34 | 31 | 105 | 3.39 |
| Interval 7 | 1184 | 4377 | 3.70 | 70 | 169 | 2.41 |
| Interval 8 | 1180 | 4290 | 3.64 | 80 | 169 | 2.11 |
| Interval 9 | 1421 | 4269 | 3.00 | 92 | 202 | 2.20 |
| Interval 10 | 1536 | 4787 | 3.12 | 69 | 106 | 1.54 |
| Interval 11 | 1581 | 4795 | 3.03 | 79 | 137 | 1.73 |
| Interval 12 | 1484 | 4223 | 2.85 | 66 | 101 | 1.53 |

Source：PubMed

**Tab.5 Journals and publications in the top five relative categories of SARS and COVID-19 research (2003-2020)**

| Category | 2003 | 2020 |
| --- | --- | --- |
| Virology | 23 | 39 |
| Public, Environmental & Occupational Health | 89 | 378 |
| Medicine, General & Internal | 102 | 318 |
| Immunology | 114 | 177 |
| Infectious Diseases | 41 | 119 |

Source：JCR

**Tab. 6 First co-occurrence terms and months for different research themes for COVID-19 and SARS**

| Cluster |  | SARS | COVID-19 |
| --- | --- | --- | --- |
| Clinical Presentation & Prognostic Risk Factors | Months after the first case | 4 | 2 |
| Co-occurrence items | Fever; Dyspnea; Male; Middle aged; Lung; Aged; Radiography; Cough | Tomography, x-ray computed; Male; Female; Fever; Adult; Middle aged; Lung; Aged; Cough; Child; Adolescent; Child, Preschool; Infant; Age factors; Radiography, thoracic; Prognosis; Young adult |
| Ecology | Months after the first case | 5 | 2 |
| Co-occurrence items | Phylogeny; SARS Virus; Animals; RNA, Viral | Phylogeny; SARS Virus; Animals; RNA, Viral; SARS Virus; Genome, Viral; Spike glycoprotein, Coronavirus; Amino acid sequence; Sequence alignment; Antibodies, Viral; Disease reservoirs; Virus replication |
| Non-Pharmaceutical Interventions | Months after the first case | 5 | 2 |
| Co-occurrence items | Contact tracing | Infection control; Communicable disease control; Travel; World health organization; Public health |
| Diagnostics | Months after the first case | 5 | 2 |
| Co-occurrence items | Polymerase chain reaction | Tomography, x-ray computed;  Radiography, thoracic |
| Modeling | Months after the first case | 6 | 2 |
| Co-occurrence items | Risk factors;  Severity of illness index;  Time factors | Risk assessment; Incidence |
| Pharmaceutical Interventions | Months after the first case | 6 | 2 |
| Co-occurrence items | Antiviral agents; Ribavirin; Anti-inflammatory agents; Respiration, artificial; Drug therapy, combination therapy;  Clinical laboratory techniques; Treatment outcome | Antiviral agents; Clinical laboratory techniques; Antibodies, Viral; Hospitalization; Intensive care units |
| Epidemiology | Months after the first case | 6 | 2 |
| Co-occurrence items | Cross infection;  Coronavirus infections | Coronavirus infections |
| Vaccine | Months after the first case | 7 | 2 |
| Co-occurrence items | Antibodies, Viral | Antibodies, Viral |

Source：PubMed

**Fig. S2 SARS publication trends over five years after the first global case**

Source: PubMed

**Fig. S3** **COVID-19 publication trends over 12 months after the first disclosed case**

Source: PubMed

**Search String**

SARS:

((("Severe acute respiratory syndrome") OR ("SARS") OR ("SARS-CoV-1") OR ("SARSr-CoV") OR ("NOVEL CORONAVIRUS"))) AND (("2003/07/10"[Date - Publication] : "2003/08/09"[Date - Publication]))

(NOTE: Search dates are examples)

COVID-19:

((("2019-nCoV") OR ("COVID-19") OR ("SARS-CoV-2") OR ("hcov") OR ("NCOVID-19") OR ("severe acute respiratory syndrome coronavirus 2") OR ("NOVEL CORONAVIRUS"))) AND (("2019/12/30"[Date - Publication] : "2020/01/29"[Date - Publication]))

(NOTE: Search dates are examples)

1. The time and country of the first case of COVID-19 is still remains under controversial. China is the first country to disclose COVID-19; therefore, so the research adopted the first case of China as the first case in global case. The time of the first case in China refersed to the academic paper from of Wu and McGoogan (2020), which is a more authoritative publication. In the article from Wu and McGoogan (2020), December 8, 2019 was marked as the date of the first and disclosed case of COVID-19, November 16,2002 was marked as the date of the first and disclosed case of SARS. [↑](#footnote-ref-1)
